# Supplementary material for: Mechanistic and microkinetic study of non-oxidative methane coupling on a single-atom iron catalyst
Source: PubMed Central journal article supplement (PMC9814405; doi:10.1038/s42004-020-0306-1), 2020-05-08
Supplement: 42004_2020_306_MOESM1_ESM.pdf [file 42004_2020_306_MOESM1_ESM.pdf]

# Mechanistic and microkinetic study of non-oxidative methane coupling on a single-atom iron catalyst

Seok Ki Kim,<sup>1,2,\*</sup> Hyun Woo Kim,<sup>3</sup> Seung Ju Han,<sup>1</sup> Sung Woo Lee,<sup>1</sup> Jungho Shin,<sup>3</sup> Yong Tae Kim<sup>1,\*</sup>

<sup>1</sup> C1 Gas & Carbon Convergent Research Center, Korea Research Institute of Chemical Technology, Daejeon 34114, Republic of Korea

<sup>2</sup> Advanced Materials and Chemical Engineering, University of Science and Technology, Daejeon 34113, Republic of Korea

<sup>3</sup> Chemical Data-Driven Research Center, Korea Research Institute of Chemical Technology, Daejeon 34114, Republic of Korea

\*Corresponding authors: skkim726@kriict.re.kr, ytkim@kriict.re.kr

## Contents

|                                                                                                                                       |          |
|---------------------------------------------------------------------------------------------------------------------------------------|----------|
| <b>Supplementary Figure 1.</b> Transition state scaling and BEP scaling.....                                                          | <b>2</b> |
| <b>Supplementary Figure 2.</b> Change in free energies of activation.....                                                             | <b>3</b> |
| <b>Supplementary Figure 3.</b> Degree of rate control for all states .....                                                            | <b>4</b> |
| <b>Supplementary Table 1.</b> Hydrocarbon distributions obtained using the Fe@CRS catalyst under various reaction conditions. . . . . | <b>5</b> |

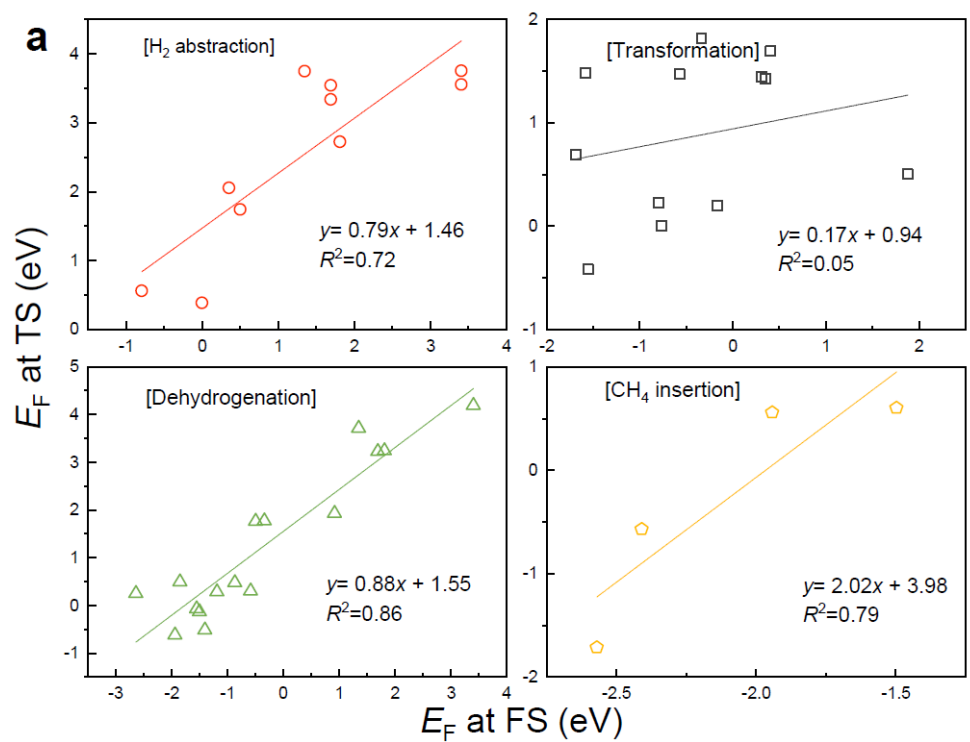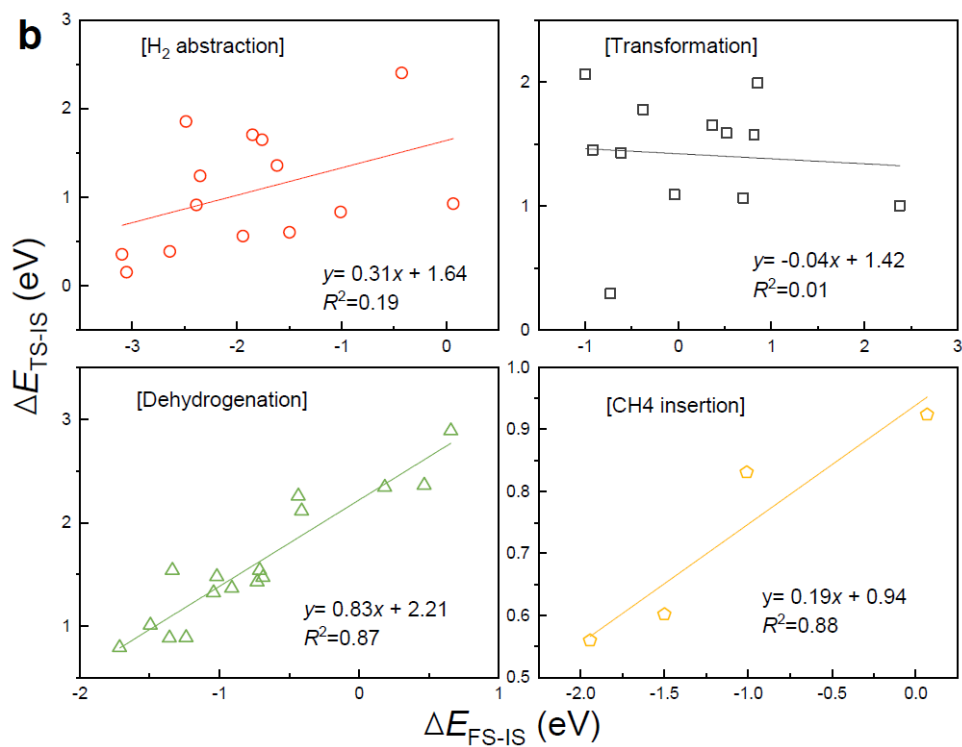

**Supplementary Figure 1. a**, Transition-state scaling with formation energy at final state ( $E_F$  at FS). **b**, Brønsted-Evans-Polanyi (BEP) relation.

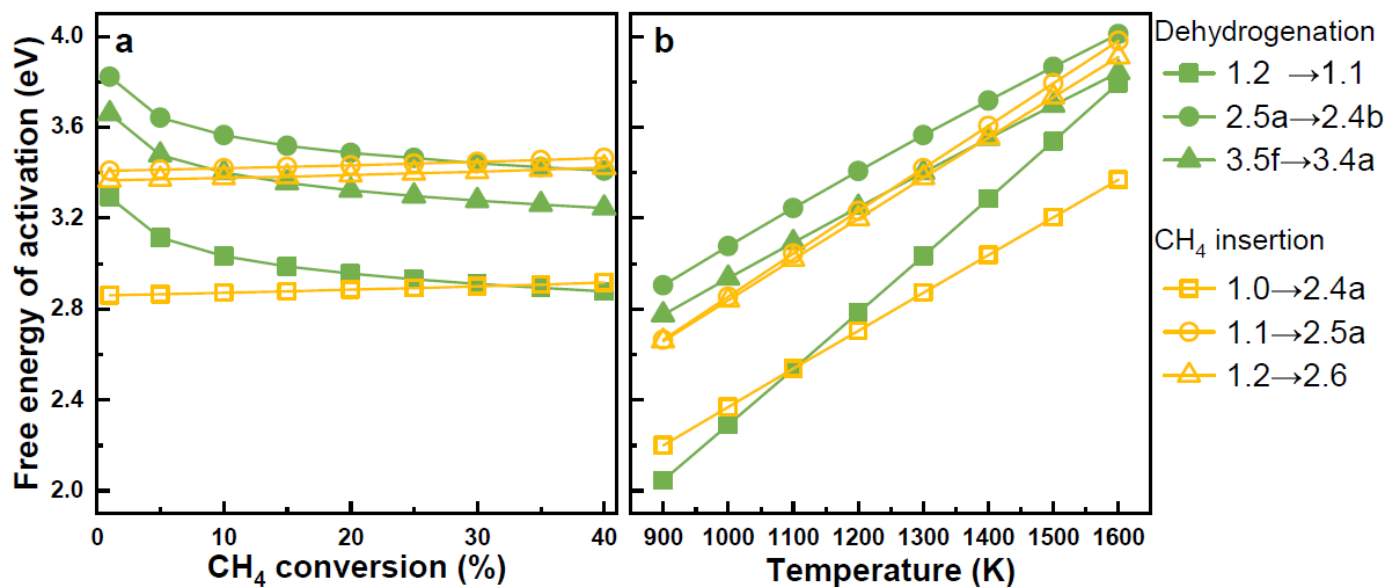

**Supplementary Figure 2. Change in free energies of activation for dehydrogenation and CH<sub>4</sub> insertion reactions. a,** Effect of CH<sub>4</sub> conversion at 1300 K and 1 bar. **b,** Effect of reaction temperature at CH<sub>4</sub> conversion of 10% and 1 bar. CH<sub>4</sub> was assumed to be converted to CH<sub>3</sub> and 1/2 H<sub>2</sub>.

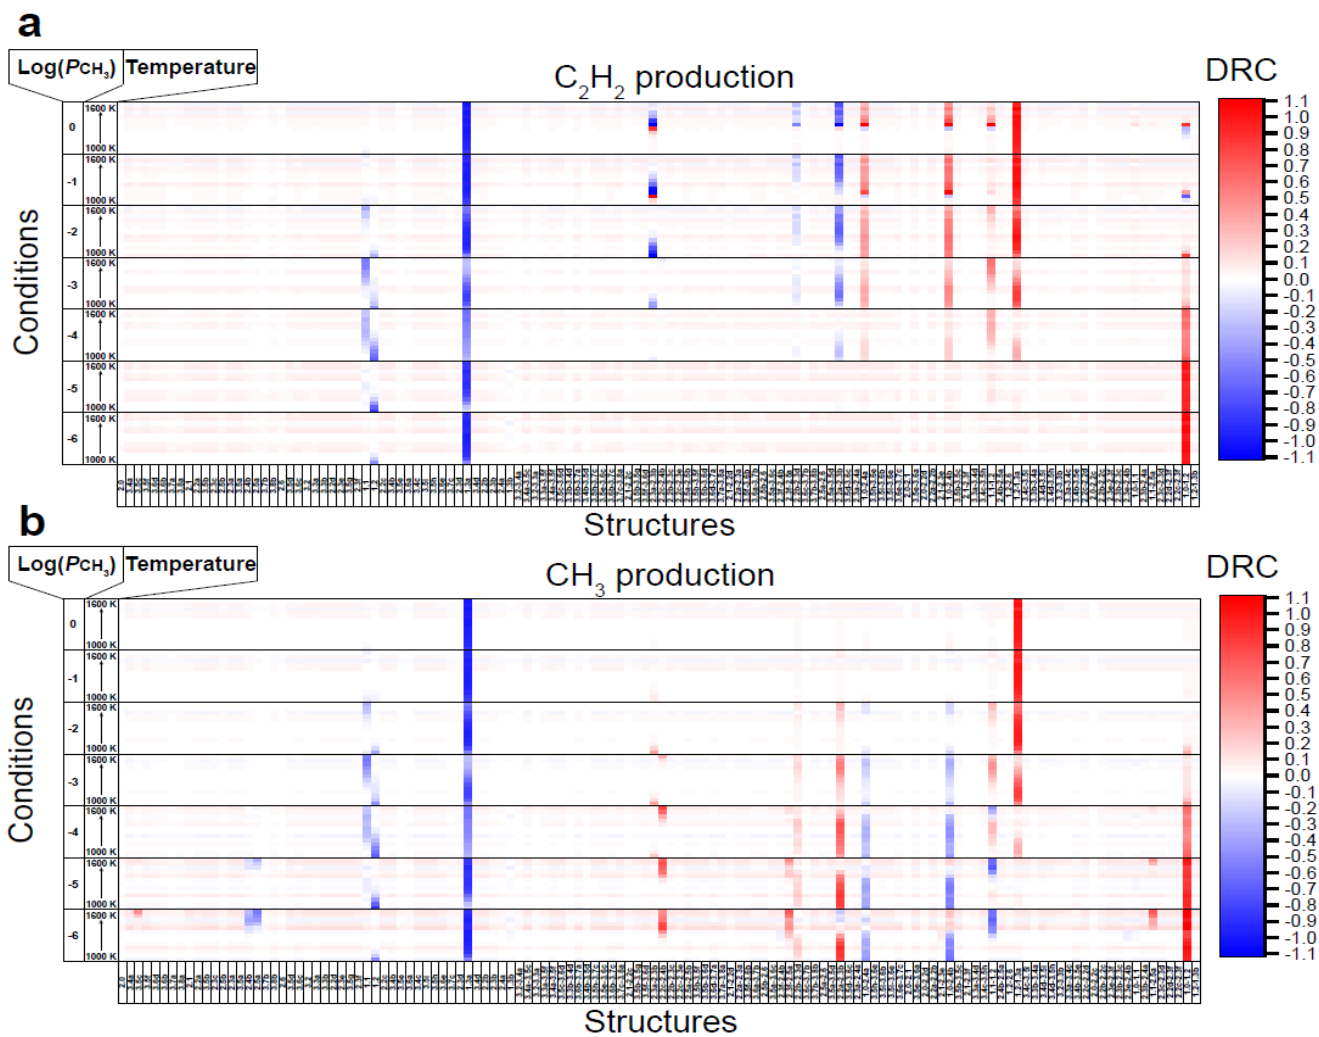

**Supplementary Figure 3.** Degree of rate control calculated for all states calculated under different reaction conditions. **a**, DRC values for the production of  $C_2H_2$ . **b**, DRC values for the production of  $CH_3$ .

**Supplementary Table 1.** Hydrocarbon distributions obtained using the Fe@CRS catalyst under various reaction conditions.

| $t_{\text{gas}}^{\text{a}}$<br>(s) | $t_{\text{cat}}^{\text{b}}$<br>(s) | $X^{\text{c}}$<br>(%) | Selectivity (%)               |                               |                               |                |                |                |                               |                               |                                |                |      |
|------------------------------------|------------------------------------|-----------------------|-------------------------------|-------------------------------|-------------------------------|----------------|----------------|----------------|-------------------------------|-------------------------------|--------------------------------|----------------|------|
|                                    |                                    |                       | C <sub>2</sub> H <sub>6</sub> | C <sub>2</sub> H <sub>4</sub> | C <sub>2</sub> H <sub>2</sub> | C <sub>3</sub> | C <sub>4</sub> | C <sub>5</sub> | C <sub>6</sub> H <sub>6</sub> | C <sub>7</sub> H <sub>8</sub> | C <sub>10</sub> H <sub>8</sub> | Alkyl benzenes | Coke |
| 1.7                                | 0.0                                | 1.0                   | 20.0                          | 38.4                          | 8.9                           | 8.0            | 9.5            | 1.8            | 2.0                           | 0.0                           | 0.0                            | 3.1            | 8.3  |
| 2.3                                | 0.0                                | 1.8                   | 13.1                          | 34.5                          | 12.0                          | 7.9            | 12.8           | 2.8            | 6.0                           | 1.4                           | 0.9                            | 3.2            | 5.4  |
| 2.8                                | 0.0                                | 2.9                   | 9.6                           | 32.3                          | 14.8                          | 7.6            | 12.7           | 2.8            | 11.6                          | 2.9                           | 3.2                            | 2.4            | 0.0  |
| 11.3                               | 0.0                                | 24.3                  | 1.0                           | 15.9                          | 11.3                          | 1.2            | 1.1            | 0.5            | 22.4                          | 1.7                           | 11.4                           | 3.3            | 30.3 |
| 1.8                                | 0.0                                | 4.7                   | 6.0                           | 28.1                          | 16.9                          | 6.1            | 9.5            | 2.1            | 9.9                           | 2.3                           | 2.2                            | 3.8            | 13.0 |
| 2.4                                | 0.1                                | 7.3                   | 3.9                           | 23.6                          | 17.3                          | 4.5            | 1.8            | 1.8            | 12.5                          | 2.7                           | 3.7                            | 3.8            | 24.5 |
| 11.7                               | 0.3                                | 26.6                  | 0.8                           | 14.9                          | 11.4                          | 1.0            | 1.0            | 0.5            | 19.0                          | 1.3                           | 5.9                            | 2.5            | 41.8 |
| 40.4                               | 1.1                                | 42.3                  | 0.8                           | 9.1                           | 4.6                           | 0.3            | 0.2            | 0.1            | 13.1                          | 0.4                           | 5.5                            | 1.0            | 64.9 |
| 1.8                                | 0.1                                | 6.5                   | 4.4                           | 26.9                          | 18.7                          | 5.0            | 7.6            | 1.6            | 11.8                          | 2.5                           | 3.3                            | 2.8            | 15.3 |
| 2.4                                | 0.1                                | 9.5                   | 2.8                           | 22.1                          | 18.1                          | 3.6            | 5.2            | 1.4            | 12.8                          | 2.4                           | 4.3                            | 3.1            | 24.2 |
| 3.0                                | 0.2                                | 11.0                  | 2.3                           | 21.3                          | 18.5                          | 3.3            | 4.5            | 1.2            | 15.3                          | 2.6                           | 5.5                            | 3.9            | 21.5 |
| 12.0                               | 0.6                                | 27.2                  | 0.8                           | 14.2                          | 11.0                          | 0.9            | 0.8            | 0.3            | 16.5                          | 1.1                           | 4.7                            | 2.0            | 47.6 |
| 41.5                               | 2.1                                | 41.5                  | 0.8                           | 9.5                           | 4.7                           | 0.3            | 0.2            | 0.1            | 12.5                          | 0.4                           | 4.9                            | 1.0            | 65.6 |
| 2.2                                | 0.2                                | 7.9                   | 3.4                           | 24.6                          | 18.0                          | 4.4            | 6.2            | 0.0            | 10.1                          | 2.1                           | 2.5                            | 5.3            | 23.4 |
| 2.9                                | 0.3                                | 10.6                  | 2.2                           | 20.4                          | 17.1                          | 3.2            | 4.5            | 0.0            | 10.4                          | 1.8                           | 3.0                            | 4.5            | 32.9 |
| 3.7                                | 0.3                                | 12.2                  | 2.0                           | 19.3                          | 17.4                          | 2.8            | 3.8            | 0.0            | 11.9                          | 1.9                           | 4.0                            | 3.8            | 33.2 |
| 14.6                               | 1.2                                | 26.3                  | 0.8                           | 13.8                          | 11.3                          | 1.0            | 0.9            | 0.0            | 13.4                          | 0.9                           | 4.5                            | 2.1            | 51.5 |
| 50.5                               | 4.3                                | 40.4                  | 0.8                           | 10.0                          | 5.1                           | 0.3            | 0.2            | 0.0            | 11.2                          | 0.4                           | 4.1                            | 1.1            | 66.8 |

<sup>a</sup> Gas-phase residence time

<sup>b</sup> Catalyst contact time

<sup>c</sup> Methane conversion
