# Supplementary material for: Mechanistic and microkinetic study of non-oxidative methane coupling on a single-atom iron catalyst
Source: PubMed Central journal article supplement (PMC9814405; doi:10.1038/s42004-020-0306-1), 2020-05-08
Supplement: 42004_2020_306_MOESM2_ESM.pdf [file 42004_2020_306_MOESM2_ESM.pdf]

## Description of Additional Supplementary Files

File Name: Supplementary Data 1

Description: Structures, formation energies, and vibrational frequencies of species used in microkinetic analysis for the non-oxidative methane coupling reaction. Formation energies were calculated using electronic energies of CH<sub>4</sub>, H<sub>2</sub>, and structure '1.0' as references. Color reference: brown, C; white, H; silver, Si; red, O; gold; Fe.

File Name: Supplementary Data 2

Description: Elementary reactions involved in the microkinetic modelling. \* and \_g denote surface and gas-phase species, respectively.
