# Supplementary material for: Mechanistic and microkinetic study of non-oxidative methane coupling on a single-atom iron catalyst
Source: PubMed Central journal article supplement (PMC9814405; doi:10.1038/s42004-020-0306-1), 2020-05-08
Supplement: 42004_2020_306_MOESM3_ESM.pdf [file 42004_2020_306_MOESM3_ESM.pdf]

**Supplementary data 1.** Structures, formation energies, and vibrational frequencies of species used in microkinetic analysis for the non-oxidative methane coupling reaction. Formation energies were calculated using electronic energies of CH<sub>4</sub>, H<sub>2</sub>, and structure '1.0' as references. Color reference: brown, C; white, H; silver, Si; red, O; gold; Fe.

| Notation                      | Structure                                                                           | Formation energy (eV) | Vibrational frequencies (cm <sup>-1</sup> )                                                               |
|-------------------------------|-------------------------------------------------------------------------------------|-----------------------|-----------------------------------------------------------------------------------------------------------|
| CH <sub>4</sub>               | 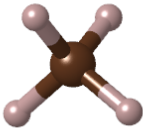   | 0.000                 | 3450, 3333, 2963, 2801, 2151, 1703, 1272, 502, 242, 73                                                    |
| H <sub>2</sub>                |    | 0.000                 | 4422, 92, 45                                                                                              |
| C <sub>2</sub> H <sub>2</sub> |   | 4.079                 | 3415, 3319, 1994, 767, 765, 618, 613, 108, 89                                                             |
| C <sub>2</sub> H <sub>4</sub> |  | 2.139                 | 3152, 3122, 3070, 3059, 1640, 1458, 1358, 1224, 1041, 948, 935, 823, 10, 4                                |
| C <sub>2</sub> H <sub>6</sub> |  | 0.729                 | 3018, 3003, 2947, 2945, 2754, 2731, 1492, 1488, 1396, 1389, 1302, 1230, 957, 820, 819, 326, 257, 118, 114 |
| CH <sub>3</sub>               |  | 2.263                 | 3215, 3196, 3036, 1395, 1392, 524, 172, 109, 60                                                           |
| 1.0                           |  | 0.000                 |                                                                                                           |

| Notation | Structure                                                                           | Formation energy (eV) | Vibrational frequencies (cm <sup>-1</sup> )                         |
|----------|-------------------------------------------------------------------------------------|-----------------------|---------------------------------------------------------------------|
| 1.1      | 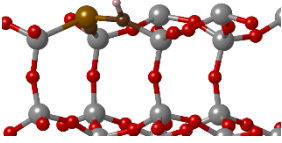   | -1.402                | 2675, 851, 406                                                      |
| 1.2      |    | -2.639                | 2886, 2707, 1287, 847, 807, 398                                     |
| 1.3a     |    | -2.723                | 3002, 2964, 2820, 1462, 1428, 1268, 776,<br>714, 551, 248, 213, 149 |
| 1.3b     |   | -1.982                | 3049, 3013, 2920, 1424, 1396, 1125, 627,<br>584, 429, 191, 95, 69   |
| 2.0      |  | 3.404                 | 844, 140, 125                                                       |
| 2.1      |  | 1.690                 | 3065, 845, 736, 668, 143, 66                                        |
| 2.2a     |  | -0.865                | 3016, 2964, 1494, 1001, 966, 934, 540,<br>175, 73                   |

| Notation | Structure                                                                           | Formation energy (eV) | Vibrational frequencies (cm <sup>-1</sup> )                                             |
|----------|-------------------------------------------------------------------------------------|-----------------------|-----------------------------------------------------------------------------------------|
| 2.2b     | 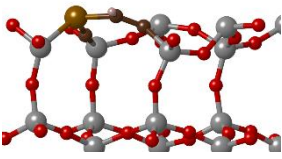   | -0.165                | 3014, 2828, 1474, 1236, 1071, 837, 676,<br>572, 503, 272, 232, 200                      |
| 2.2c     |    | 0.353                 | 3096, 2968, 1337, 848, 655, 570, 126, 66                                                |
| 2.2d     |    | 0.310                 | 2904, 2883, 899, 852, 612, 508                                                          |
| 2.3a     |   | -0.583                | 2949, 2920, 2886, 1445, 1439, 1351, 989,<br>863, 655, 168, 142, 69                      |
| 2.3b     |  | -1.578                | 3114, 3000, 2860, 1476, 1317, 1197,<br>1016, 916, 847, 660, 577, 384, 341, 283,<br>105  |
| 2.3c     |  | -0.764                | 2988, 2880, 2848, 1424, 1262, 1156,<br>1105, 1009, 760, 640, 560, 474, 308, 225,<br>165 |
| 2.3d     |  | -1.684                | 3095, 2971, 2913, 1460, 1221, 987, 912,<br>865, 800, 632, 353, 192                      |

| Notation | Structure                                                                           | Formation energy (eV) | Vibrational frequencies (cm <sup>-1</sup> )                                                      |
|----------|-------------------------------------------------------------------------------------|-----------------------|--------------------------------------------------------------------------------------------------|
| 2.3e     | 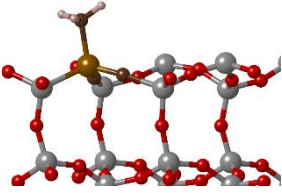   | -0.065                | 3071, 3007, 2929, 1421, 1399, 1127, 639, 613, 451, 156, 99, 78                                   |
| 2.3f     |    | -0.792                | 3098, 2951, 2723, 1343, 951, 869, 676, 626, 571, 413, 188, 135                                   |
| 2.4a     |    | -1.941                | 3013, 2947, 2916, 2655, 1475, 1464, 1389, 1202, 1057, 986, 918, 873, 634, 409, 307, 220, 145, 62 |
| 2.4b     |   | -1.497                | 3062, 3020, 2935, 2727, 1434, 1403, 1144, 917, 691, 672, 498, 444, 185, 122, 86                  |
| 2.5a     |  | -2.409                | 3087, 3019, 2908, 1451, 1407, 1187, 769, 721, 449, 260, 179, 143                                 |
| 2.5b     |  | -1.553                | 3094, 2936, 1322, 806, 669, 527, 457, 167, 117                                                   |
| 2.6      |  | -2.570                | 2986, 2950, 2883, 1462, 1435, 1240, 799, 704, 564, 302, 184, 152                                 |

| Notation | Structure                                                                           | Formation energy (eV) | Vibrational frequencies (cm <sup>-1</sup> )                                                       |
|----------|-------------------------------------------------------------------------------------|-----------------------|---------------------------------------------------------------------------------------------------|
| 3.2      | 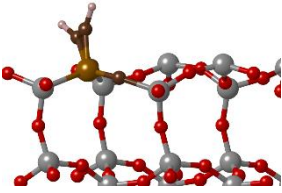   | 1.348                 | 3114, 2959, 1265, 1088, 1004, 845, 801, 686, 611, 295, 235, 107                                   |
| 3.3a     |    | 1.814                 | 3111, 3026, 2985, 1518, 1363, 1203, 943, 931, 900, 464, 392, 240, 108, 84, 56                     |
| 3.3b     |    | 0.175                 | 3076, 2967, 2861, 1286, 1132, 1020, 916, 850, 810, 758, 645, 529, 316, 293, 132                   |
| 3.4a     |   | 0.923                 | 3378, 3282, 1899, 758, 703, 650, 553, 129, 98, 88, 49, 31                                         |
| 3.4b     |  | -0.199                | 3139, 2975, 1584, 1149, 864, 848, 570, 547, 272, 166, 85                                          |
| 3.4c     |  | 0.148                 | 3118, 3046, 3025, 2973, 1438, 1424, 1205, 1118, 1006, 959, 900, 810, 673, 557, 401, 244, 156, 107 |
| 3.4d     |  | 1.084                 | 3119, 3026, 2937, 2866, 1517, 1361, 1206, 949, 935, 906, 895, 508, 416, 395, 246, 155, 94, 36     |

| Notation | Structure                                                                           | Formation energy (eV) | Vibrational frequencies (cm <sup>-1</sup> )                                            |
|----------|-------------------------------------------------------------------------------------|-----------------------|----------------------------------------------------------------------------------------|
| 3.5a     | 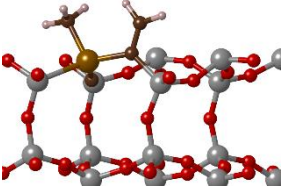   | -0.497                | 3090, 3033, 2938, 1427, 1405, 1126, 657,<br>617, 442, 250, 149, 115                    |
| 3.5b     |    | 0.039                 | 3132, 3055, 1487, 1319, 876, 724, 521,<br>356, 315, 171, 94, 70                        |
| 3.5c     |    | -0.335                | 3358, 2873, 1787, 754, 678, 528, 486,<br>216, 192, 125, 47, 35                         |
| 3.5d     |   | 1.880                 | 3130, 2961, 1561, 1152, 865, 855, 571,<br>551, 289, 194, 121, 32                       |
| 3.5e     |  | -2.378                | 3118, 3044, 3023, 1591, 1419, 1277,<br>1021, 1005, 959, 574, 509, 304, 163, 111,<br>77 |
| 3.5f     |  | -0.571                | 3111, 3033, 2895, 1565, 1386, 1187, 920,<br>846, 816, 457, 432, 312, 226, 124, 68      |
| 3.5g     |  | 0.406                 | 3087, 3024, 1480, 994, 973, 920, 584,<br>302, 114                                      |

| Notation | Structure                                                                           | Formation energy (eV) | Vibrational frequencies (cm <sup>-1</sup> )                                                                                                |
|----------|-------------------------------------------------------------------------------------|-----------------------|--------------------------------------------------------------------------------------------------------------------------------------------|
| 3.5h     | 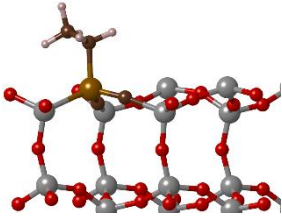   | 0.503                 | 3034, 3010, 2974, 2919, 2901, 1473,<br>1464, 1422, 1383, 1209, 1128, 960, 926,<br>880, 606, 421, 238, 189, 96, 84, 71                      |
| 3.5i     |    | -0.164                | 3173, 3142, 3082, 3060, 2792, 1524,<br>1448, 1244, 1217, 971, 966, 910, 878,<br>820, 562, 435, 341, 191, 122, 90, 75                       |
| 3.6a     |    | -1.937                | 3160, 3065, 2979, 2900, 1445, 1420,<br>1223, 1124, 1016, 928, 700, 568, 486,<br>255, 220, 176, 90, 72                                      |
| 3.6b     |   | -1.184                | 3172, 3143, 3072, 3064, 1587, 1454,<br>1328, 1223, 1031, 990, 958, 823, 377,<br>196, 114, 95, 37                                           |
| 3.6c     |  | -0.930                | 3125, 3046, 3037, 1525, 1374, 1263,<br>1023, 975, 915, 583, 544, 345, 304, 208,<br>98                                                      |
| 3.6d     |  | -0.744                | 3084, 3015, 2995, 1535, 1374, 1221, 972,<br>941, 929, 499, 388, 193, 104, 92, 49                                                           |
| 3.6e     |  | -0.728                | 3019, 2988, 2979, 2925, 2880, 2874,<br>1470, 1463, 1420, 1381, 1217, 1140,<br>1003, 995, 929, 885, 661, 568, 407, 244,<br>224, 156, 49, 25 |

| Notation | Structure                                                                           | Formation energy (eV) | Vibrational frequencies (cm <sup>-1</sup> )                                                                                                                |
|----------|-------------------------------------------------------------------------------------|-----------------------|------------------------------------------------------------------------------------------------------------------------------------------------------------|
| 3.7a     | 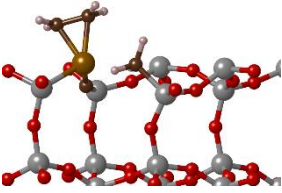   | -1.870                | 3127, 3083, 3048, 3005, 1498, 1441,<br>1206, 1194, 937, 897, 859, 792, 618, 428,<br>340, 147, 119, 91                                                      |
| 3.7b     |    | -2.978                | 2995, 2978, 2956, 2940, 1446, 1434,<br>1238, 1225, 1072, 1028, 882, 783, 721,<br>582, 554, 308, 201, 166                                                   |
| 3.7c     |    | -1.847                | 3021, 3004, 2980, 2922, 2890, 2870,<br>2769, 1476, 1471, 1410, 1383, 1308,<br>1213, 1130, 956, 919, 907, 886, 865, 596,<br>409, 395, 241, 202, 122, 89, 56 |
| 3.8a     |   | -1.663                | 3040, 2999, 2977, 2946, 2772, 1481,<br>1464, 1414, 1383, 1172, 1111, 981, 945,<br>923, 545, 319, 206, 119, 104, 57                                         |
| 3.8b     |  | -1.771                | 3033, 3010, 2957, 2820, 2714, 1488,<br>1486, 1471, 1399, 1205, 1154, 976, 954,<br>908, 855, 559, 313, 272, 168, 154, 77                                    |
| 1.0-1.2  |  | 0.387                 | 3256, 2578, 1205, 696, 503, 336                                                                                                                            |
| 1.0-2.4a |  | 0.559                 | 3158, 3112, 2999, 2003, 1437, 1414,<br>1140, 989, 784, 557, 311, 142, 94, 60                                                                               |



| Notation | Structure                                                                           | Formation energy (eV) | Vibrational frequencies (cm <sup>-1</sup> )                                                                 |
|----------|-------------------------------------------------------------------------------------|-----------------------|-------------------------------------------------------------------------------------------------------------|
| 1.0-2.4b | 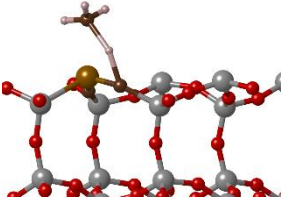   | 0.601                 | 3070, 3026, 2938, 1673, 1440, 1431, 1136, 856, 692, 542, 177, 137, 106, 93                                  |
| 1.1-1.2  |    | -0.516                | 3153, 3143, 3004, 1404, 1400, 1251, 1089, 1013, 526, 475, 397, 101, 69, 34                                  |
| 1.1-2.5a |    | -0.571                | 3111, 3055, 2974, 2870, 1747, 1460, 1438, 1217, 1128, 947, 804, 651, 529, 389, 208, 158, 115                |
| 1.2-1.3b |   | 0.245                 | 3102, 3057, 2993, 2801, 1750, 1426, 1393, 1188, 692, 599, 371, 223, 133, 103                                |
| 1.2-2.6  |  | -1.715                | 3070, 2995, 2923, 1966, 1444, 1429, 1207, 974, 831, 538, 382, 181, 169, 83, 2886, 2707, 1287, 847, 807, 398 |
| 2.0-2.1  |  | 4.194                 | 3073, 3066, 2959, 1428, 1427, 1200, 1187, 1174, 847, 536, 516, 275, 241, 207, 147, 93, 83                   |
| 2.1-2.2c |  | 3.227                 | 3218, 3215, 3099, 3047, 2947, 2870, 1391, 1387, 1333, 822, 687, 573, 529, 380, 154, 135, 124, 93, 73, 56    |

| Notation  | Structure                                                                           | Formation energy (eV) | Vibrational frequencies (cm <sup>-1</sup> )                                                                                                                              |
|-----------|-------------------------------------------------------------------------------------|-----------------------|--------------------------------------------------------------------------------------------------------------------------------------------------------------------------|
| 2.1-2.3f  | 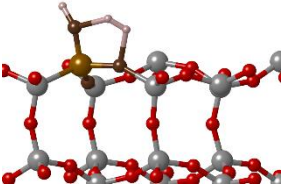   | 3.540                 | 2855, 1976, 1019, 899, 797, 744, 652,<br>431, 310, 201, 97                                                                                                               |
| 2.2a-2.2b |    | 0.198                 | 2993, 2768, 1395, 1259, 993, 881, 645,<br>549, 408, 307, 246, 160                                                                                                        |
| 2.2a-2.3b |    | 0.478                 | 3227, 3207, 3107, 3043, 2735, 1476,<br>1393, 1389, 1216, 990, 942, 839, 806,<br>609, 541, 324, 260, 206, 185, 124, 115,<br>82, 50                                        |
| 2.2b-2.2c |   | 1.422                 | 3134, 3063, 1378, 816, 642, 574, 336, 121                                                                                                                                |
| 2.2c-2.4b |  | 2.054                 | 3261, 3164, 3021, 1417, 1371, 1260,<br>1095, 629, 620, 531, 449, 194, 138, 31                                                                                            |
| 2.3a-2.4a |  | 0.298                 | 3171, 3129, 3008, 3001, 2971, 2914,<br>1474, 1462, 1408, 1405, 1381, 1320,<br>1126, 1055, 1039, 987, 958, 642, 553,<br>513, 425, 315, 276, 268, 194, 166, 115,<br>97, 78 |
| 2.3b-2.3c |  | -0.001                | 3132, 3034, 2794, 1465, 1312, 1196, 937,<br>919, 857, 616, 406, 341, 285, 151                                                                                            |

| Notation  | Structure                                                                           | Formation energy (eV) | Vibrational frequencies (cm <sup>-1</sup> )                                                                                                                                                                 |
|-----------|-------------------------------------------------------------------------------------|-----------------------|-------------------------------------------------------------------------------------------------------------------------------------------------------------------------------------------------------------|
| 2.3e-2.3f | 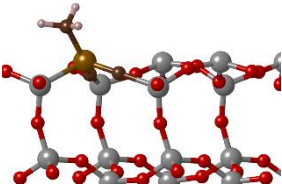   | 0.226                 | 3041, 3010, 2926, 1431, 1412, 1154, 665, 406, 183, 125, 98                                                                                                                                                  |
| 2.3f-2.5a |    | 0.561                 | 3027, 2929, 2846, 2432, 1366, 1329, 1124, 972, 842, 701, 656, 639, 524, 455, 308, 138, 86                                                                                                                   |
| 2.4b-2.5a |    | -0.135                | 3089, 3083, 3080, 3038, 2960, 2921, 2680, 1439, 1420, 1418, 1401, 1269, 1167, 1149, 1100, 923, 744, 724, 689, 592, 573, 540, 492, 460, 404, 259, 236, 158, 143, 122, 111, 105                               |
| 2.5a-2.5b |   | -0.419                | 3108, 2996, 1791, 1351, 1013, 773, 617, 576, 500, 206, 110, 2886, 2707, 1287, 847, 807, 398                                                                                                                 |
| 2.5b-2.6  |  | -0.077                | 3175, 3169, 3045, 3020, 2969, 2918, 2894, 2854, 1829, 1468, 1437, 1407, 1396, 1341, 1341, 1238, 1205, 1027, 877, 857, 809, 718, 706, 565, 551, 520, 449, 367, 340, 334, 305, 260, 215, 185, 171, 89, 71, 57 |
| 3.2-3.3a  |  | 3.709                 | 3218, 3214, 3090, 3069, 3045, 2919, 1513, 1392, 1387, 1361, 1166, 942, 906, 869, 574, 560, 475, 337, 281, 259, 127, 118, 44                                                                                 |
| 3.3a-3.4d |  | 3.238                 | 3202, 3194, 3116, 3030, 3020, 2940, 2319, 1517, 1396, 1389, 1360, 1209, 1006, 952, 933, 911, 732, 661, 580, 423, 399, 350, 309, 246, 178, 157, 105, 70, 46                                                  |

| Notation  | Structure                                                                           | Formation energy (eV) | Vibrational frequencies (cm <sup>-1</sup> )                                                                                                                                                                                  |
|-----------|-------------------------------------------------------------------------------------|-----------------------|------------------------------------------------------------------------------------------------------------------------------------------------------------------------------------------------------------------------------|
| 3.4a-3.5f | 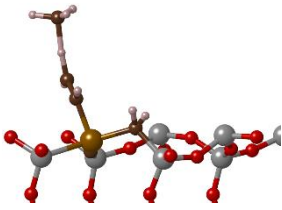   | 1.929                 | 3166, 3160, 3107, 3014, 2923, 2879,<br>2817, 1574, 1414, 1405, 1397, 1315,<br>1182, 1116, 972, 953, 896, 866, 806, 626,<br>577, 564, 386, 372, 364, 241, 205, 127,<br>76, 63, 38, 3                                          |
| 3.5a-3.6c |    | 1.759                 | 3218, 3174, 3120, 3069, 3036, 3028,<br>3014, 2979, 2945, 1527, 1425, 1413,<br>1390, 1385, 1378, 1371, 1267, 1131,<br>1027, 959, 921, 672, 626, 594, 566, 546,<br>429, 370, 359, 308, 286, 212, 185, 151,<br>149, 133, 80, 67 |
| 3.5b-3.5c |    | 1.816                 | 3343, 2983, 2887, 2798, 2439, 1710,<br>1476, 1423, 1219, 829, 710, 638, 581,<br>383, 354, 330, 280, 203, 195, 163, 78, 57,<br>6                                                                                              |
| 3.5b-3.5f |  | 1.468                 | 3067, 3060, 2983, 2956, 2460, 1559,<br>1508, 1351, 1327, 1172, 899, 863, 751,<br>691, 610, 523, 430, 373, 335, 237, 168,<br>84, 48                                                                                           |
| 3.5b-3.5g |  | 1.692                 | 3118, 3045, 3012, 3004, 2935, 1516,<br>1465, 1442, 1360, 1246, 950, 828, 818,<br>791, 562, 477, 433, 379, 336, 302, 265,<br>206, 70                                                                                          |
| 3.5c-3.6d |  | 1.774                 | 3154, 3153, 3069, 3024, 3017, 3011,<br>2987, 2857, 1507, 1453, 1406, 1404,<br>1356, 1256, 1193, 1092, 1080, 958, 912,<br>835, 777, 617, 588, 584, 561, 446, 399,<br>213, 194, 159, 158, 130, 94, 76, 36                      |
| 3.5h-3.7c |  | 1.743                 | 3133, 3022, 2993, 2964, 2937, 2880,<br>1471, 1467, 1407, 1383, 1211, 1125, 987,<br>911, 875, 765, 579, 568, 416, 284, 270,<br>222, 205, 84, 70, 17                                                                           |

| Notation  | Structure                                                                          | Formation energy (eV) | Vibrational frequencies (cm <sup>-1</sup> )                                                                                                                                                                                                     |
|-----------|------------------------------------------------------------------------------------|-----------------------|-------------------------------------------------------------------------------------------------------------------------------------------------------------------------------------------------------------------------------------------------|
| 3.6a-3.7b | 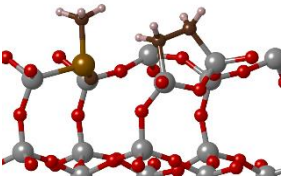  | -0.617                | 3217, 3214, 3065, 3054, 3047, 3019, 2986, 2957, 2940, 2906, 1442, 1428, 1417, 1392, 1390, 1388, 1224, 1217, 1132, 1127, 1044, 887, 739, 666, 630, 612, 610, 541, 518, 437, 314, 185, 162, 104, 94, 81, 77, 64                                   |
| 3.6b-3.7a |   | 0.283                 | 3208, 3200, 3085, 3034, 3032, 3015, 3001, 2886, 2742, 1495, 1461, 1438, 1399, 1392, 1387, 1213, 1203, 1190, 931, 909, 899, 859, 793, 779, 626, 596, 538, 425, 343, 251, 238, 199, 158, 152, 142, 117, 107, 102, 71, 53, 40                      |
| 3.7c-3.8a |  | 0.492                 | 3200, 3174, 3012, 3006, 2989, 2948, 2947, 2897, 2874, 2836, 2498, 1480, 1479, 1441, 1415, 1402, 1391, 1389, 1380, 1252, 1230, 1225, 1145, 950, 938, 895, 791, 732, 617, 563, 554, 463, 402, 385, 304, 269, 233, 206, 184, 153, 119, 103, 84, 49 |
