# Supplementary material for: Mechanistic and microkinetic study of non-oxidative methane coupling on a single-atom iron catalyst
Source: PubMed Central journal article supplement (PMC9814405; doi:10.1038/s42004-020-0306-1), 2020-05-08
Supplement: 42004_2020_306_MOESM4_ESM.pdf [file 42004_2020_306_MOESM4_ESM.pdf]

**Supplementary data 2.** Elementary reactions involved in the microkinetic modelling. \* and \_g denote surface and gas-phase species, respectively.

| #  | Reaction  | Expression                                  |
|----|-----------|---------------------------------------------|
| 1  | 1.0-1.1   | *_s + CH4_g <-> H-CH3* -> H* + CH3_g        |
| 2  | 1.0-1.2   | *_s + H2_g <-> H-H* -> H2*                  |
| 3  | 1.0-2.3a  | *_s + CH3_g -> CH3*                         |
| 4  | 1.0-2.4a  | *_s + CH4_g <-> C-H4* -> HCH3*              |
| 5  | 1.0-2.4b  | *_s + CH4_g <-> CH-H3* -> CH3H*             |
| 6  | 1.0-3.2   | *_s + C2H2_g -> CHCH*                       |
| 7  | 1.0-3.4c  | *_s + C2H4_g -> H2CCH2*                     |
| 8  | 1.1-1.2   | H* + CH4_g <-> H2-CH3* -> H2* + CH3_g       |
| 9  | 1.1-3.3b  | H* + C2H2_g -> CHCHH*                       |
| 10 | 1.1-2.4a  | H* + CH3_g -> HCH3*                         |
| 11 | 1.1-2.4b  | H* + CH3_g -> CH3H*                         |
| 12 | 1.1-2.5a  | H* + CH4_g <-> H-CH4* -> CH3H2*             |
| 13 | 1.1-3.5i  | H* + C2H4_g -> H2CCH2H*                     |
| 14 | 1.2-1.3a  | H2* + CH4_g <-> H2H-CH3* -> H2H* + CH3_g    |
| 15 | 1.2-1.3b  | H2* + CH4_g <-> HH2-CH3* -> HH2* + CH3_g    |
| 16 | 1.2-2.5a  | H2* + CH3_g -> CH3H2*                       |
| 17 | 1.2-2.5b  | H2* + CH3_g -> CH2H3*                       |
| 18 | 1.2-2.6   | H2* + CH4_g <-> H2-CH4* -> CH3H3*           |
| 19 | 1.2-3.4a  | H2* + C2H2_g -> C2H2H2*                     |
| 20 | 1.2-3.4b  | H2* + C2H2_g -> H2C2H2*                     |
| 21 | 1.2-3.6a  | H2* + C2H4_g -> H2C2H4*                     |
| 22 | 1.2-3.6b  | H2* + C2H4_g -> C2H4H2*                     |
| 23 | 1.3a-3.5c | H2H* + C2H2_g -> C2H2H3*                    |
| 24 | 1.3a-3.7a | H2H* + C2H4_g -> C2H4H3*                    |
| 25 | 1.3b-3.5d | HH2* + C2H2_g -> CH3HCH*                    |
| 26 | 1.3b-3.7b | HH2* + C2H4_g -> CH3H2CH2*                  |
| 27 | 2.0-2.1   | C* + CH4_g <-> CH-CH3* -> CH* + CH3_g       |
| 28 | 2.0-2.2c  | C* + H2_g <-> H-CH* -> H2C*                 |
| 29 | 2.0-2.2d  | C* + H2_g <-> CH-H* -> CHH*                 |
| 30 | 2.1-2.2c  | CH* + CH4_g <-> CH2-CH3* -> H2C* + CH3_g    |
| 31 | 2.1-2.2d  | CH* + CH4_g <-> CH3-CH2* -> CHH* + CH3_g    |
| 32 | 2.1-2.3e  | CH* + H2_g <-> CH-H2* -> CHH2*              |
| 33 | 2.1-2.3f  | CH* + H2_g <-> CH-H-H* -> CHHH*             |
| 34 | 2.2a-2.2b | CH2* <-> C-H-H* -> HCH*                     |
| 35 | 2.2a-2.3a | CH2* + CH4_g <-> CH3-CH3* -> CH3* + CH3_g   |
| 36 | 2.2a-2.3b | CH2* + CH4_g <-> CH3-HCH2* -> HCH2* + CH3_g |
| 37 | 2.2a-3.5a | CH2* + CH3_g -> CH3CH2*                     |
| 38 | 2.2a-3.5g | CH2* + CH3_g -> CHHCH3*                     |
| 39 | 2.2b-2.2c | HCH* <-> H-C-H* -> H2C*                     |

|    |           |                                                                                                                                                                                              |
|----|-----------|----------------------------------------------------------------------------------------------------------------------------------------------------------------------------------------------|
| 40 | 2.2b-2.3c | $\text{HCH}^* + \text{CH}_4\text{\_g} \leftrightarrow \text{CH}_2\text{H}-\text{CH}_3^* \rightarrow \text{CH}_2\text{H}^* + \text{CH}_3\text{\_g}$                                           |
| 41 | 2.2b-2.3d | $\text{HCH}^* + \text{CH}_4\text{\_g} \leftrightarrow \text{CH}_3-\text{H}_2\text{CH}^* \rightarrow \text{H}_2\text{CH}^* + \text{CH}_3\text{\_g}$                                           |
| 42 | 2.2b-3.5c | $\text{HCH}^* + \text{CH}_3\text{\_g} \rightarrow \text{C}_2\text{H}_2\text{H}_3^*$                                                                                                          |
| 43 | 2.2b-3.5d | $\text{HCH}^* + \text{CH}_3\text{\_g} \rightarrow \text{CH}_3\text{HCH}^*$                                                                                                                   |
| 44 | 2.2c-2.2d | $\text{H}_2\text{C}^* \leftrightarrow \text{HC}-\text{H}^* \rightarrow \text{CHH}^*$                                                                                                         |
| 45 | 2.2c-2.3e | $\text{H}_2\text{C}^* + \text{CH}_4\text{\_g} \leftrightarrow \text{CH}_2-\text{HCH}_3^* \rightarrow \text{CHH}_2^* + \text{CH}_3\text{\_g}$                                                 |
| 46 | 2.2c-2.3f | $\text{H}_2\text{C}^* + \text{CH}_4\text{\_g} \leftrightarrow \text{HCH}-\text{HCH}_3^* \rightarrow \text{CHHH}^* + \text{CH}_3\text{\_g}$                                                   |
| 47 | 2.2c-3.5h | $\text{H}_2\text{C}^* + \text{CH}_3\text{\_g} \rightarrow \text{H}_2\text{CCH}_3^*$                                                                                                          |
| 48 | 2.2c-2.4b | $\text{H}_2\text{C}^* + \text{H}_2\text{\_g} \leftrightarrow \text{CH}_2-\text{H}_2^* \rightarrow \text{CH}_3\text{H}^*$                                                                     |
| 49 | 2.2d-2.3f | $\text{CHH}^* + \text{CH}_4\text{\_g} \leftrightarrow \text{HCH}-\text{H}_2\text{CH}_2^* \rightarrow \text{CHHH}^* + \text{CH}_3\text{\_g}$                                                  |
| 50 | 2.3a-2.3b | $\text{CH}_3^* \leftrightarrow \text{CH}_2-\text{H}^* \rightarrow \text{HCH}_2^*$                                                                                                            |
| 51 | 2.3a-2.4a | $\text{CH}_3^* + \text{CH}_4\text{\_g} \leftrightarrow \text{CH}_3-\text{HCH}_3^* \rightarrow \text{HCH}_3^* + \text{CH}_3\text{\_g}$                                                        |
| 52 | 2.3b-2.3c | $\text{HCH}_2^* \leftrightarrow \text{H}-\text{CH}_2^* \rightarrow \text{CH}_2\text{H}^*$                                                                                                    |
| 53 | 2.3b-2.4a | $\text{HCH}_2^* + \text{CH}_4\text{\_g} \leftrightarrow \text{HCH}_3-\text{CH}_3^* \rightarrow \text{HCH}_3^* + \text{CH}_3\text{\_g}$                                                       |
| 54 | 2.3c-2.3d | $\text{CH}_2\text{H}^* \leftrightarrow \text{HC}-\text{H}-\text{H}^* \rightarrow \text{H}_2\text{CH}^*$                                                                                      |
| 55 | 2.3c-3.6d | $\text{CH}_2\text{H}^* + \text{CH}_3\text{\_g} \rightarrow \text{C}_2\text{H}_3\text{H}_3^*$                                                                                                 |
| 56 | 2.3d-3.6c | $\text{H}_2\text{CH}^* + \text{CH}_3\text{\_g} \rightarrow \text{CH}_3\text{HCH}_2^*$                                                                                                        |
| 57 | 2.3e-2.3f | $\text{CHH}_2^* \leftrightarrow \text{HC}-\text{H}_2^* \rightarrow \text{CHHH}^*$                                                                                                            |
| 58 | 2.3e-2.4b | $\text{CHH}_2^* + \text{CH}_4\text{\_g} \leftrightarrow \text{HCH}_2-\text{CH}_4^* \rightarrow \text{CH}_3\text{H}^* + \text{CH}_3\text{\_g}$                                                |
| 59 | 2.3f-2.4b | $\text{CHHH}^* + \text{CH}_4\text{\_g} \leftrightarrow \text{CH}_3-\text{CH}_4^* \rightarrow \text{CH}_3\text{H}^* + \text{CH}_3\text{\_g}$                                                  |
| 60 | 2.3f-3.6e | $\text{CHHH}^* + \text{CH}_3\text{\_g} \rightarrow \text{H}_2\text{CCH}_3\text{H}^*$                                                                                                         |
| 61 | 2.3f-2.5a | $\text{CHHH}^* + \text{H}_2\text{\_g} \leftrightarrow \text{CH}_3-\text{H}_2^* \rightarrow \text{CH}_3\text{H}_2^*$                                                                          |
| 62 | 2.4b-2.5a | $\text{CH}_3\text{H}^* + \text{CH}_4\text{\_g} \leftrightarrow \text{H}_2\text{CH}_3-\text{CH}_3^* \rightarrow \text{CH}_3\text{H}_2^* + \text{CH}_3\text{\_g}$                              |
| 63 | 2.5a-2.5b | $\text{CH}_3\text{H}_2^* \leftrightarrow \text{CH}_2-\text{H}-\text{H}_2^* \rightarrow \text{CH}_2\text{H}_3^*$                                                                              |
| 64 | 2.5a-2.6  | $\text{CH}_3\text{H}_2^* + \text{CH}_4\text{\_g} \leftrightarrow \text{CH}_3\text{H}_3-\text{CH}_3^* \rightarrow \text{CH}_3\text{H}_3^* + \text{CH}_3\text{\_g}$                            |
| 65 | 2.5a-3.8b | $\text{CH}_3\text{H}_2^* + \text{CH}_3\text{\_g} \rightarrow \text{CH}_3\text{H}_2\text{CH}_3^*$                                                                                             |
| 66 | 2.5b-2.6  | $\text{CH}_2\text{H}_3^* + \text{CH}_4\text{\_g} \leftrightarrow \text{CH}_3-\text{CH}_3\text{H}_3^* \rightarrow \text{CH}_3\text{H}_3^* + \text{CH}_3\text{\_g}$                            |
| 67 | 2.5b-3.8a | $\text{CH}_2\text{H}_3^* + \text{CH}_3\text{\_g} \rightarrow \text{C}_2\text{H}_5\text{H}_3^*$                                                                                               |
| 68 | 3.2-3.3a  | $\text{CHCH}^* + \text{CH}_4\text{\_g} \leftrightarrow \text{C}_2\text{H}_3-\text{CH}_3^* \rightarrow \text{CHCH}_2^* + \text{CH}_3\text{\_g}$                                               |
| 69 | 3.2-3.3b  | $\text{CHCH}^* + \text{CH}_4\text{\_g} \leftrightarrow \text{HC}_2\text{H}_2-\text{CH}_3^* \rightarrow \text{CHCHH}^* + \text{CH}_3\text{\_g}$                                               |
| 70 | 3.2-3.4a  | $\text{CHCH}^* + \text{H}_2\text{\_g} \leftrightarrow \text{C}_2\text{H}_2-\text{H}_2^* \rightarrow \text{C}_2\text{H}_2\text{H}_2^*$                                                        |
| 71 | 3.3a-3.4c | $\text{CHCH}_2^* + \text{CH}_4\text{\_g} \leftrightarrow \text{HC}_2\text{H}_3-\text{CH}_3^* \rightarrow \text{H}_2\text{CCH}_2^* + \text{CH}_3\text{\_g}$                                   |
| 72 | 3.3a-3.4d | $\text{CHCH}_2^* + \text{CH}_4\text{\_g} \leftrightarrow \text{H}_2\text{C}_2\text{H}_2-\text{CH}_3^* \rightarrow \text{HCCH}_2\text{H}^* + \text{CH}_3\text{\_g}$                           |
| 73 | 3.3a-3.5f | $\text{CHCH}_2^* + \text{H}_2\text{\_g} \leftrightarrow \text{C}_2\text{H}_3-\text{H}_2^* \rightarrow \text{C}_2\text{H}_3\text{H}_2^*$                                                      |
| 74 | 3.3b-3.4a | $\text{CHCHH}^* + \text{CH}_4\text{\_g} \leftrightarrow \text{H}_3\text{C}_2\text{H}-\text{CH}_3^* \rightarrow \text{C}_2\text{H}_2\text{H}_2^* + \text{CH}_3\text{\_g}$                     |
| 75 | 3.3b-3.4d | $\text{CHCHH}^* + \text{CH}_4\text{\_g} \leftrightarrow \text{C}_2\text{H}_4-\text{CH}_3^* \rightarrow \text{HCCH}_2\text{H}^* + \text{CH}_3\text{\_g}$                                      |
| 76 | 3.4a-3.5c | $\text{C}_2\text{H}_2\text{H}_2^* + \text{CH}_4\text{\_g} \leftrightarrow \text{C}_2\text{H}_2\text{H}_3-\text{CH}_3^* \rightarrow \text{C}_2\text{H}_2\text{H}_3^* + \text{CH}_3\text{\_g}$ |
| 77 | 3.4a-3.5f | $\text{C}_2\text{H}_2\text{H}_2^* + \text{CH}_4\text{\_g} \leftrightarrow \text{C}_2\text{H}_3\text{H}_2-\text{CH}_3^* \rightarrow \text{C}_2\text{H}_3\text{H}_2^* + \text{CH}_3\text{\_g}$ |
| 78 | 3.4b-3.5d | $\text{H}_2\text{C}_2\text{H}_2^* + \text{CH}_4\text{\_g} \leftrightarrow \text{C}_2\text{H}_5-\text{CH}_3^* \rightarrow \text{CH}_3\text{HCH}^* + \text{CH}_3\text{\_g}$                    |
| 79 | 3.4b-3.5e | $\text{H}_2\text{C}_2\text{H}_2^* + \text{CH}_4\text{\_g} \leftrightarrow \text{HC}_2\text{H}_4-\text{CH}_3^* \rightarrow \text{H}_2\text{C}_2\text{H}_3^* + \text{CH}_3\text{\_g}$          |
| 80 | 3.4c-3.5h | $\text{H}_2\text{CCH}_2^* + \text{CH}_4\text{\_g} \leftrightarrow \text{H}_2\text{C}_2\text{H}_3-\text{CH}_3^* \rightarrow \text{H}_2\text{CCH}_3^* + \text{CH}_3\text{\_g}$                 |
| 81 | 3.4c-3.5i | $\text{H}_2\text{CCH}_2^* + \text{CH}_4\text{\_g} \leftrightarrow \text{H}_3\text{C}_2\text{H}_2-\text{CH}_3^* \rightarrow \text{H}_2\text{CCH}_2\text{H}^* + \text{CH}_3\text{\_g}$         |
| 82 | 3.4d-3.5i | $\text{HCCH}_2\text{H}^* + \text{CH}_4\text{\_g} \leftrightarrow \text{H}_4\text{C}_2\text{H}-\text{CH}_3^* \rightarrow \text{H}_2\text{CCH}_2\text{H}^* + \text{CH}_3\text{\_g}$            |
| 83 | 3.4d-3.5h | $\text{HCCH}_2\text{H}^* + \text{CH}_4\text{\_g} \leftrightarrow \text{H}_5\text{C}_2-\text{CH}_3^* \rightarrow \text{H}_2\text{CCH}_3^* + \text{CH}_3\text{\_g}$                            |

|     |           |                                                                                                                                                                                      |
|-----|-----------|--------------------------------------------------------------------------------------------------------------------------------------------------------------------------------------|
| 84  | 3.5a-3.6c | $\text{CH}_3\text{CH}_2^* + \text{CH}_4\_g \leftrightarrow \text{CH}_3\text{-CH}_3\text{HCH}_2^* \rightarrow \text{CH}_3\text{HCH}_2^* + \text{CH}_3\_g$                             |
| 85  | 3.5a-3.5d | $\text{CH}_3\text{CH}_2^* \leftrightarrow \text{CH}_3\text{-H-CH}^* \rightarrow \text{CH}_3\text{HCH}^*$                                                                             |
| 86  | 3.5b-3.5c | $\text{CH}_2\text{CH}_3^* \leftrightarrow \text{CH-H-CH}_3^* \rightarrow \text{C}_2\text{H}_2\text{H}_3^*$                                                                           |
| 87  | 3.5b-3.5g | $\text{CH}_2\text{CH}_3^* \leftrightarrow \text{C-H}_2\text{CH}_3^* \rightarrow \text{CHHCH}_3^*$                                                                                    |
| 88  | 3.5b-3.5f | $\text{CH}_2\text{CH}_3^* \leftrightarrow \text{CH}_2\text{-H-H}_2\text{C}^* \rightarrow \text{C}_2\text{H}_3\text{H}_2^*$                                                           |
| 89  | 3.5b-3.6d | $\text{CH}_2\text{CH}_3^* + \text{CH}_4\_g \leftrightarrow \text{CH}_3\text{-C}_2\text{H}_3\text{H}_3^* \rightarrow \text{C}_2\text{H}_3\text{H}_3^* + \text{CH}_3\_g$               |
| 90  | 3.5c-3.6d | $\text{C}_2\text{H}_2\text{H}_3^* + \text{CH}_4\_g \leftrightarrow \text{C}_2\text{H}_3\text{H}_3\text{-CH}_3^* \rightarrow \text{C}_2\text{H}_3\text{H}_3^* + \text{CH}_3\_g$       |
| 91  | 3.5d-3.6c | $\text{CH}_3\text{HCH}^* + \text{CH}_4\_g \leftrightarrow \text{CH}_3\text{HCH}_2\text{-CH}_3^* \rightarrow \text{CH}_3\text{HCH}_2^* + \text{CH}_3\_g$                              |
| 92  | 3.5e-3.6c | $\text{H}_2\text{C}_2\text{H}_3^* + \text{CH}_4\_g \leftrightarrow \text{C}_2\text{H}_6\text{-CH}_3^* \rightarrow \text{CH}_3\text{HCH}_2^* + \text{CH}_3\_g$                        |
| 93  | 3.5e-3.6a | $\text{H}_2\text{C}_2\text{H}_3^* + \text{CH}_4\_g \leftrightarrow \text{CHCH}_5\text{-CH}_3^* \rightarrow \text{H}_2\text{C}_2\text{H}_4^* + \text{CH}_3\_g$                        |
| 94  | 3.5f-3.6d | $\text{C}_2\text{H}_3\text{H}_2^* + \text{CH}_4\_g \leftrightarrow \text{CH}_2\text{CH}_4\text{-CH}_3^* \rightarrow \text{C}_2\text{H}_3\text{H}_3^* + \text{CH}_3\_g$               |
| 95  | 3.5f-3.6b | $\text{C}_2\text{H}_3\text{H}_2^* + \text{CH}_4\_g \leftrightarrow \text{CH}_3\text{CH}_3\text{-CH}_3^* \rightarrow \text{C}_2\text{H}_4\text{H}_2^* + \text{CH}_3\_g$               |
| 96  | 3.5h-3.6e | $\text{H}_2\text{CCH}_3^* + \text{CH}_4\_g \leftrightarrow \text{CH}_4\text{CH}_2\text{-CH}_3^* \rightarrow \text{H}_2\text{CCH}_3\text{H}^* + \text{CH}_3\_g$                       |
| 97  | 3.5h-3.7c | $\text{H}_2\text{CCH}_3^* + \text{H}_2\_g \leftrightarrow \text{C}_2\text{H}_5\text{-H}_2^* \rightarrow \text{H}_2\text{CCH}_3\text{H}_2^*$                                          |
| 98  | 3.5i-3.6b | $\text{H}_2\text{CCH}_2\text{H}^* + \text{CH}_4\_g \leftrightarrow \text{CH}_5\text{CH-CH}_3^* \rightarrow \text{C}_2\text{H}_4\text{H}_2^* + \text{CH}_3\_g$                        |
| 99  | 3.5i-3.6e | $\text{H}_2\text{CCH}_2\text{H}^* + \text{CH}_4\_g \leftrightarrow \text{CH}_6\text{C-CH}_3^* \rightarrow \text{H}_2\text{CCH}_3\text{H}^* + \text{CH}_3\_g$                         |
| 100 | 3.6a-3.7b | $\text{H}_2\text{C}_2\text{H}_4^* + \text{CH}_4\_g \leftrightarrow \text{CH}_3\text{-CH}_3\text{H}_2\text{CH}_2^* \rightarrow \text{CH}_3\text{H}_2\text{CH}_2^* + \text{CH}_3\_g$   |
| 101 | 3.6b-3.7c | $\text{C}_2\text{H}_4\text{H}_2^* + \text{CH}_4\_g \leftrightarrow \text{C}_2\text{H}_7\text{-CH}_3^* \rightarrow \text{H}_2\text{CCH}_3\text{H}_2^* + \text{CH}_3\_g$               |
| 102 | 3.6b-3.7a | $\text{C}_2\text{H}_4\text{H}_2^* + \text{CH}_4\_g \leftrightarrow \text{C}_2\text{H}_4\text{H}_3\text{-CH}_3^* \rightarrow \text{C}_2\text{H}_4\text{H}_3^* + \text{CH}_3\_g$       |
| 103 | 3.6c-3.7b | $\text{CH}_3\text{HCH}_2^* + \text{CH}_4\_g \leftrightarrow \text{CH}_3\text{H}_2\text{CH}_2\text{-CH}_3^* \rightarrow \text{CH}_3\text{H}_2\text{CH}_2^* + \text{CH}_3\_g$          |
| 104 | 3.6d-3.7a | $\text{C}_2\text{H}_3\text{H}_3^* + \text{CH}_4\_g \leftrightarrow \text{CH}_3\text{-C}_2\text{H}_4\text{H}_3^* \rightarrow \text{C}_2\text{H}_4\text{H}_3^* + \text{CH}_3\_g$       |
| 105 | 3.6e-3.7c | $\text{H}_2\text{CCH}_3\text{H}^* + \text{CH}_4\_g \leftrightarrow \text{CH}_6\text{CH-CH}_3^* \rightarrow \text{H}_2\text{CCH}_3\text{H}_2^* + \text{CH}_3\_g$                      |
| 106 | 3.7a-3.8a | $\text{C}_2\text{H}_4\text{H}_3^* + \text{CH}_4\_g \leftrightarrow \text{CH}_3\text{-C}_2\text{H}_5\text{H}_3^* \rightarrow \text{C}_2\text{H}_5\text{H}_3^* + \text{CH}_3\_g$       |
| 107 | 3.7b-3.8b | $\text{CH}_3\text{H}_2\text{CH}_2^* + \text{CH}_4\_g \leftrightarrow \text{CH}_3\text{H}_2\text{CH}_3\text{-CH}_3^* \rightarrow \text{CH}_3\text{H}_2\text{CH}_3^* + \text{CH}_3\_g$ |
| 108 | 3.7c-3.8a | $\text{H}_2\text{CCH}_3\text{H}_2^* + \text{CH}_4\_g \leftrightarrow \text{C}_2\text{H}_8\text{-CH}_3^* \rightarrow \text{C}_2\text{H}_5\text{H}_3^* + \text{CH}_3\_g$               |
